# Supplementary material
Source: ML conference proceedings conference paper supplement (https://openaccess.thecvf.com/content/CVPR_2019/html/Mescheder_Occupancy_Networks_Learning_CVPR_2019_paper.html)
Supplement: Supplementary file 1 [file Mescheder_Occupancy_Networks_Learning_CVPR_2019_supplemental.zip]

Archive with 2 entries (2 files):
- 3976-supp.pdf
- 3976-video.mp4
